# Supplementary material
Source: PubMed Central journal article supplement (PMC6171713)

**Supplementary Table 1: GenBank Accession number, genome assembly statistics, and virMine analysis statistics for the 30 metagenomes**

| <b>Patient</b> | <b>SRA Run Accession #</b> | <b># of paired reads</b> | <b># of paired reads after QC</b> | <b># of singleton reads after QC</b> | <b># of paired reads mapped to H19</b> | <b># contigs &gt;1000bp</b> | <b># bp in contigs &gt;1000bp</b> | <b># bacterial</b> | <b># viral</b> | <b># unknown</b> |
|----------------|----------------------------|--------------------------|-----------------------------------|--------------------------------------|----------------------------------------|-----------------------------|-----------------------------------|--------------------|----------------|------------------|
| C012           | ERR926139                  | 477,767                  | 403,786                           | 27,068                               | 33,074                                 | 95                          | 164,214                           | 50                 | 4              | 41               |
| C014           | ERR926140                  | 109,093                  | 46,469                            | 12,680                               | 2,655                                  | 138                         | 221,567                           | 119                | 12             | 7                |
| C019           | ERR926141                  | 218,059                  | 169,773                           | 16,673                               | 9,494                                  | 55                          | 101,091                           | 22                 | 2              | 31               |
| C020           | ERR926142                  | 429,582                  | 373,893                           | 24,225                               | 34,985                                 | 139                         | 1,736,140                         | 133                | 1              | 5                |
| C023           | ERR926143                  | 444,302                  | 397,258                           | 23,122                               | 29,637                                 | 720                         | 1,456,882                         | 666                | 28             | 26               |
| C026           | ERR926144                  | 399,820                  | 332,890                           | 26,734                               | 36,129                                 | 80                          | 134,298                           | 66                 | 9              | 5                |
| C030           | ERR926145                  | 294,961                  | 228,347                           | 21,571                               | 21,268                                 | 140                         | 228,170                           | 120                | 13             | 7                |
| C032           | ERR926146                  | 333,632                  | 298,079                           | 17,015                               | 28,904                                 | 57                          | 105,116                           | 23                 | 3              | 31               |
| C035           | ERR926147                  | 354,350                  | 287,819                           | 23,123                               | 17,043                                 | 126                         | 1,735,774                         | 119                | 4              | 3                |
| C037           | ERR926148                  | 228,765                  | 205,830                           | 11,676                               | 18,616                                 | 55                          | 96,127                            | 18                 | 5              | 32               |
| OAB010         | ERR926149                  | 1,485,099                | 1,384,890                         | 74,022                               | 15,099                                 | 81                          | 3,996,120                         | 63                 | 8              | 10               |
| OAB018         | ERR926150                  | 1,006,540                | 947,019                           | 41,013                               | 20,560                                 | 409                         | 5,755,177                         | 364                | 33             | 12               |
| OAB021         | ERR926151                  | 197,665                  | 151,339                           | 15,503                               | 15,891                                 | 35                          | 71,730                            | 31                 | 3              | 1                |
| OAB024         | ERR926152                  | 82,502                   | 54,864                            | 7,899                                | 4,010                                  | 17                          | 27,226                            | 16                 | 1              | 0                |
| OAB025         | ERR926153                  | 138,664                  | 121,783                           | 8,650                                | 13,501                                 | 32                          | 66,041                            | 29                 | 2              | 1                |
| OAB026         | ERR926109                  | 463,425                  | 318,210                           | 36,520                               | 9,414                                  | 467                         | 2,384,407                         | 450                | 12             | 5                |
| OAB027         | ERR926110                  | 299,569                  | 89,654                            | 54,710                               | 4,978                                  | 20                          | 33,381                            | 15                 | 3              | 2                |
| OAB030         | ERR926111                  | 278,727                  | 246,089                           | 13,383                               | 20,550                                 | 50                          | 97,221                            | 44                 | 3              | 3                |
| OAB031         | ERR926112                  | 287,621                  | 250,033                           | 15,647                               | 22,006                                 | 63                          | 108,361                           | 59                 | 2              | 2                |
| OAB032         | ERR926113                  | 309,017                  | 285,263                           | 13,722                               | 14,708                                 | 60                          | 1,714,396                         | 52                 | 4              | 4                |
| OAB039         | ERR926114                  | 545,321                  | 461,255                           | 30,878                               | 7,032                                  | 279                         | 2,192,535                         | 241                | 13             | 25               |
| OAB041         | ERR926115                  | 217,193                  | 158,665                           | 17,605                               | 15,506                                 | 33                          | 62,683                            | 32                 | 0              | 1                |
| OAB042         | ERR926116                  | 399,050                  | 318,466                           | 28,998                               | 23,764                                 | 544                         | 1,216,472                         | 509                | 11             | 24               |
| OAB045         | ERR926117                  | 585,884                  | 466,727                           | 43,068                               | 23,224                                 | 1686                        | 3,579,386                         | 1615               | 43             | 28               |
| OAB048         | ERR926118                  | 175,272                  | 37,338                            | 30,149                               | 1,185                                  | 7                           | 10,888                            | 6                  | 0              | 1                |
| OAB049         | ERR926119                  | 415,230                  | 327,085                           | 20,351                               | 23,290                                 | 97                          | 158,079                           | 56                 | 4              | 37               |
| OAB051         | ERR926120                  | 461,737                  | 421,210                           | 24,003                               | 25,779                                 | 89                          | 154,556                           | 61                 | 2              | 26               |
| OAB052         | ERR926121                  | 513,060                  | 441,079                           | 29,367                               | 20,687                                 | 1352                        | 3,562,632                         | 1276               | 24             | 52               |
| OAB056         | ERR926122                  | 273,836                  | 250,794                           | 12,151                               | 22,237                                 | 59                          | 102,237                           | 52                 | 3              | 4                |
| OAB062         | ERR926123                  | 111,609                  | 29,114                            | 22,329                               | 1,475                                  | 11                          | 15,655                            | 1                  | 0              | 10               |



**Supplementary Table 2: Results for contigs predicted to be viral queried via BLAST against the nr/nt database via the NCBI web interface.**

| Patient | SRA Run<br>Accession # | Contig # | BLAST hit (Record Description   Coding Region Annotation)                                    | Accession # | Contig<br>Length | Identity | Query<br>Coverage |
|---------|------------------------|----------|----------------------------------------------------------------------------------------------|-------------|------------------|----------|-------------------|
| C023    | ERR926143              | 12       | NO SIGNIFICANT SIMILARITY (e-value<1)                                                        | n/a         | 7190             | n/a      | n/a               |
|         |                        | 57       | Homo sapiens BAC clone RP11-1162J9 from chromosome unknown   unresolved tandem repeat        | AC144610    | 3994             | 99%      | 100%              |
|         |                        | 68       | Human DNA sequence from clone CH507-239L24 on chromosome 21   unannotated                    | CU638690    | 3688             | 87%      | 100%              |
|         |                        | 78       | Lactobacillus jensenii   unannotated                                                         | CP018809    | 3383             | 100%     | 1%                |
|         |                        | 87       | Lactobacillus johnsonii   transposase                                                        | CP021704    | 3241             | 74%      | 44%               |
|         |                        | 91       | Human DNA sequence from clone CH507-239L24 on chromosome 21   unannotated                    | CU638690    | 3158             | 83%      | 100%              |
|         |                        | 96       | Pan troglodytes BAC clone CH251-408A19 from chromosome 7   unannotated                       | AC198462    | 3107             | 81%      | 100%              |
|         |                        | 200      | NO SIGNIFICANT SIMILARITY (e-value<1)                                                        | n/a         | 2098             | n/a      | n/a               |
|         |                        | 224      | Pan troglodytes BAC clone CH251-175J23 from chromosome 7   unannotated                       | AC188413    | 1965             | 100%     | 1%                |
|         |                        | 233      | Lactobacillus phage Lv-1   DnaC; ssDNA binding protein; hypothetical protein; RusA resolvase | EU871039    | 1911             | 83%      | 99%               |
|         |                        | 263      | Lactobacillus crispatus   resolvase                                                          | FN692037    | 1788             | 92%      | 29%               |
|         |                        | 285      | NO SIGNIFICANT SIMILARITY (e-value<1)                                                        | n/a         | 1699             | n/a      | n/a               |
|         |                        | 288      | Lactobacillus jensenii   terminase                                                           | CP018809    | 1697             | 94%      | 100%              |
|         |                        | 311      | Aerococcus christensenii   hypothetical protein; MafB; hypothetical protein                  | CP014159    | 1626             | 78%      | 54%               |
|         |                        | 323      | Lactobacillus phage Lv-1   minor capsid protein                                              | EU871039    | 1594             | 99%      | 82%               |
|         |                        | 332      | Lactobacillus phage Lv-1   antirepressor                                                     | EU871039    | 1576             | 82%      | 37%               |
|         |                        | 403      | Homo sapiens BAC clone CTD-2053H7 from 2   unannotated                                       | AC025223    | 1414             | 88%      | 100%              |
|         |                        | 408      | Streptococcus pneumoniae   putative membrane protein; hypothetical protein                   | HG799494    | 1401             | 97%      | 100%              |
|         |                        | 420      | NO SIGNIFICANT SIMILARITY (e-value<1)                                                        | n/a         | 1387             | n/a      | n/a               |
|         |                        | 446      | NO SIGNIFICANT SIMILARITY (e-value<1)                                                        | n/a         | 1355             | n/a      | n/a               |
|         |                        | 460      | NO SIGNIFICANT SIMILARITY (e-value<1)                                                        | n/a         | 1330             | n/a      | n/a               |

**Supplementary Table 2: Results for contigs predicted to be viral queried via BLAST against the nr/nt database via the NCBI web interface.**

| Patient | SRA Run<br>Accession # | Contig # | BLAST hit (Record Description   Coding Region Annotation)                              | Accession # | Contig<br>Length | Identity | Query<br>Coverage |
|---------|------------------------|----------|----------------------------------------------------------------------------------------|-------------|------------------|----------|-------------------|
| C023    | ERR926143              | 466      | NO SIGNIFICANT SIMILARITY (e-value<1)                                                  | n/a         | 1314             | n/a      | n/a               |
|         |                        | 483      | Lactobacillus jensenii   tRNA-Ser                                                      | CP018809    | 1288             | 100%     | 3%                |
|         |                        | 506      | Lactobacillus jensenii   glycosyl hydrolase family 25                                  | CP018809    | 1249             | 96%      | 50%               |
|         |                        | 523      | NO SIGNIFICANT SIMILARITY (e-value<1)                                                  | n/a         | 1227             | n/a      | n/a               |
|         |                        | 608      | Lactobacillus phage Lv-1   terminase large subunit; portal protein                     | EU871039    | 1113             | 94%      | 99%               |
|         |                        | 688      | Homo sapiens FOSMID clone ABC12-47837900C21 from chromosome 9   unresolved duplication | AC242285    | 1034             | 98%      | 100%              |
|         |                        | 698      | NO SIGNIFICANT SIMILARITY (e-value<1)                                                  | n/a         | 1022             | n/a      | n/a               |
|         |                        |          |                                                                                        |             |                  |          |                   |
| C026    | ERR926144              | 15       | Homo sapiens FOSMID clone ABC12-47837900C21 from chromosome 9   unresolved duplication | AC242285    | 2140             | 98%      | 100%              |
|         |                        | 23       | NO SIGNIFICANT SIMILARITY (e-value<1)                                                  | n/a         | 1867             | n/a      | n/a               |
|         |                        | 27       | Homo sapiens chromosome 1 clone RP11-504P24   unannotated                              | AC138393    | 1803             | 75%      | 99%               |
|         |                        | 36       | Corynebacterium striatum   transposase                                                 | CP024932    | 1541             | 99%      | 98%               |
|         |                        | 57       | Homo sapiens BAC clone CH17-116G12 from chromosome 2   unresolved tandem repeat        | AC255551    | 1250             | 78%      | 98%               |
|         |                        | 63       | Homo sapiens FOSMID clone ABC16-1709J7 from chromosome 4   unannotated                 | AC241532    | 1140             | 80%      | 99%               |
|         |                        | 69       | Human (clone TRI-6) satellite I repeat region   repeat                                 | L01057      | 1109             | 86%      | 100%              |
|         |                        | 72       | NO SIGNIFICANT SIMILARITY (e-value<1)                                                  | n/a         | 1071             | n/a      | n/a               |
|         |                        | 80       | Spirometra erinaceieuropaei   unannotated                                              | LN146799    | 1003             | 96%      | 57%               |
|         |                        |          |                                                                                        |             |                  |          |                   |
| C030    | ERR926145              | 9        | Lactobacillus crispatus ST1   lysin; membrane protein; penicillin-binding protein      | FN692037    | 2838             | 99%      | 100%              |
|         |                        | 10       | Homo sapiens BAC clone RP11-1162J9 from chromosome unknown   unannotated               | AC144610    | 2823             | 99%      | 100%              |
|         |                        | 14       | Lactobacillus crispatus ST1   transposase                                              | FN692037    | 2380             | 98%      | 60%               |
|         |                        | 15       | Lactobacillus amylovorus   transposase                                                 | CP002338    | 2293             | 100%     | 91%               |
|         |                        | 39       | Lactobacillus helveticus   transposase                                                 | CP002429    | 1498             | 98%      | 80%               |





**Supplementary Table 2: Results for contigs predicted to be viral queried via BLAST against the nr/nt database via the NCBI web interface.**

| Patient | SRA Run<br>Accession # | Contig # | BLAST hit (Record Description   Coding Region Annotation)                                                               | Accession # | Contig<br>Length | Identity | Query<br>Coverage |
|---------|------------------------|----------|-------------------------------------------------------------------------------------------------------------------------|-------------|------------------|----------|-------------------|
| OAB018  | ERR926150              | 28       | Lactobacillus helveticus   hypothetical protein; minor capsid protein; capsid; terminase; terminase; phage tail protein | CP015496    | 37166            | 87%      | 71%               |
|         |                        | 49       | Lactobacillus helveticus   lyson; phage holin; hypothetical protein; hypothetical protein                               | CP015496    | 26779            | 85%      | 15%               |
|         |                        | 66       | NO SIGNIFICANT SIMILARITY (e-value<1)                                                                                   | n/a         | 17753            | n/a      | n/a               |
|         |                        |          | Lactobacillus allii   phage tail tape measure protein                                                                   | CP019323    | 17753            | 72%      | 3%                |
|         |                        | 125      | NO SIGNIFICANT SIMILARITY (e-value<1)                                                                                   | n/a         | 9400             | n/a      | n/a               |
|         |                        | 148      | Lactobacillus helveticus   hypothetical protein; capsid protein                                                         | CP011386    | 7640             | 76%      | 25%               |
|         |                        | 153      | NO SIGNIFICANT SIMILARITY (e-value<1)                                                                                   | n/a         | 7248             | n/a      | n/a               |
|         |                        |          | Lactobacillus helveticus   hypothetical proteins                                                                        | CP011386    | 7248             | 70%      | 95%               |
|         |                        | 175      | Lactobacillus gallinarum   transposase                                                                                  | CP012890    | 5965             | 91%      | 29%               |
|         |                        | 176      | Lactobacillus helveticus   hypothetical protein; hypothetical protein                                                   | CP015496    | 5964             | 83%      | 4%                |
|         |                        | 198      | Lactobacillus helveticus   terminase; restriction endonuclease                                                          | CP011386    | 5099             | 89%      | 53%               |
|         |                        | 207      | NO SIGNIFICANT SIMILARITY (e-value<1)                                                                                   | n/a         | 4704             | n/a      | n/a               |
|         |                        | 208      | Lactobacillus crispatus   conserved protein; rRNA                                                                       | FN692037    | 4655             | 99%      | 8%                |
|         |                        | 213      | Lactobacillus crispatus   conserved protein; hypothetical protein; LexA repressor; Acyl-coa thioesterase                | FN692037    | 4583             | 97%      | 99%               |
|         |                        | 214      | Lactobacillus amylovorus   predicted membrane protein; transposase                                                      | CP002338    | 4575             | 93%      | 38%               |
|         |                        | 217      | NO SIGNIFICANT SIMILARITY (e-value<1)                                                                                   | n/a         | 4372             | n/a      | n/a               |
|         |                        | 226      | NO SIGNIFICANT SIMILARITY (e-value<1)                                                                                   | n/a         | 4120             | n/a      | n/a               |
|         |                        | 269      | Lactobacillus crispatus   tRNAs                                                                                         | FN692037    | 2954             | 99%      | 5%                |
|         |                        | 275      | Lactobacillus helveticus   DUF2479 domain-containing protein                                                            | CP015496    | 2826             | 84%      | 27%               |
|         |                        | 284      | NO SIGNIFICANT SIMILARITY (e-value<1)                                                                                   | n/a         | 2579             | n/a      | n/a               |
|         |                        | 300      | NO SIGNIFICANT SIMILARITY (e-value<1)                                                                                   | n/a         | 2291             | n/a      | n/a               |
|         |                        | 312      | Lactobacillus helveticus   hypothetical protein                                                                         | CP015496    | 2073             | 81%      | 36%               |
|         |                        | 319      | Lactobacillus crispatus   ATP-dependent helicase/nuclease subunit A                                                     | FN692037    | 2019             | 99%      | 100%              |
|         |                        | 323      | Homo sapiens BAC clone RP11-237A9 from 4   repeat                                                                       | AC129664    | 1966             | 90%      | 99%               |
|         |                        | 332      | Lactobacillus helveticus   insertion sequence                                                                           | CP002081    | 1862             | 98%      | 62%               |
|         |                        | 338      | NO SIGNIFICANT SIMILARITY (e-value<1)                                                                                   | n/a         | 1812             | n/a      | n/a               |

**Supplementary Table 2: Results for contigs predicted to be viral queried via BLAST against the nr/nt database via the NCBI web interface.**

| Patient | SRA Run<br>Accession # | Contig # | BLAST hit (Record Description   Coding Region Annotation)                                  | Accession # | Contig<br>Length | Identity | Query<br>Coverage |
|---------|------------------------|----------|--------------------------------------------------------------------------------------------|-------------|------------------|----------|-------------------|
| OAB018  | ERR926150              | 348      | Lactobacillus helveticus   lysin                                                           | CP015496    | 1689             | 73%      | 43%               |
|         |                        | 352      | Lactobacillus jensenii   hypothetical protein                                              | CP018809    | 1638             | 81%      | 38%               |
|         |                        | 366      | Lactobacillus crispatus   transposase                                                      | FN692037    | 1425             | 99%      | 100%              |
|         |                        | 375      | Human DNA sequence from clone RP13-511L2 on chromosome X   unannotated                     | BX537339    | 1294             | 85%      | 100%              |
|         |                        | 377      | NO SIGNIFICANT SIMILARITY (e-value<1)                                                      | n/a         | 1280             | n/a      | n/a               |
|         |                        | 379      | NO SIGNIFICANT SIMILARITY (e-value<1)                                                      | n/a         | 1248             | n/a      | n/a               |
|         |                        | 389      | Pan troglodytes BAC clone CH251-398H5 from chromosome 7   unannotated                      | AC217674    | 1162             | 95%      | 100%              |
|         |                        | 396      | Lactobacillus crispatus   conserved protein; Nicotinamide mononucleotide transporter       | FN692037    | 1115             | 99%      | 100%              |
|         |                        | 403      | NO SIGNIFICANT SIMILARITY (e-value<1)                                                      | n/a         | 1088             | n/a      | n/a               |
| OAB021  | ERR926151              | 1        | JC virus variant GS/K   complete genome                                                    | AF004349    | 5219             | 99%      | 100%              |
|         |                        | 17       | Human (clone TRI-6) satellite I repeat region   tandem repeat                              | L01057      | 1734             | 83%      | 99%               |
|         |                        | 29       | Homo sapiens gene alpha satellite in centromeric region of chromosome 21   alpha satellite | D29750      | 1289             | 99%      | 100%              |
| OAB024  | ERR926152              | 10       | Human (clone TRI-6) satellite I repeat region   tandem repeat                              | L01057      | 1427             | 92%      | 100%              |
| OAB025  | ERR926153              | 30       | NO SIGNIFICANT SIMILARITY (e-value<1)                                                      | n/a         | 1143             | n/a      | n/a               |
|         |                        | 32       | JC virus variant GS/K   agno; VP2                                                          | AF004349    | 1023             | 99%      | 100%              |
| OAB026  | ERR926109              | 22       | JC virus variant GS/K   complete genome                                                    | AF004349    | 5220             | 98%      | 100%              |
|         |                        | 152      | Gardnerella vaginalis   translation initiation factor IF-2                                 | CP002725    | 1950             | 99%      | 100%              |
|         |                        | 180      | Human DNA sequence from clone CH507-416A10 on chromosome 21   unannotated                  | FP236243    | 1822             | 98%      | 100%              |
|         |                        | 182      | Human DNA sequence from clone RP11-145C1   unannotated                                     | AL162451    | 1817             | 86%      | 100%              |
|         |                        | 226      | Gardnerella vaginalis   hypothetical protein; repeat-containing protein                    | LT629773    | 1581             | 99%      | 100%              |





**Supplementary Table 2: Results for contigs predicted to be viral queried via BLAST against the nr/nt database via the NCBI web interface.**

| Patient | SRA Run<br>Accession # | Contig #                    | BLAST hit (Record Description   Coding Region Annotation)                            | Accession # | Contig<br>Length | Identity | Query<br>Coverage |
|---------|------------------------|-----------------------------|--------------------------------------------------------------------------------------|-------------|------------------|----------|-------------------|
| OAB032  | ERR926113              | 18                          | JC polyomavirus DNA isolate UZ-20   complete genome                                  | AB127023    | 5220             | 99%      | 100%              |
|         |                        | 23                          | Homo sapiens clone fosmid ABC8_4_1_000041143400_G2   unannotated                     | GQ222231    | 2496             | 90%      | 99%               |
|         |                        | 42                          | Human DNA sequence from clone CH507-416A10 on chromosome 21   unannotated            | FP236243    | 1570             | 99%      | 100%              |
|         |                        | 56                          | Homo sapiens BAC clone RP13-489M19 from 4   unannotated                              | AC127385    | 1030             | 99%      | 100%              |
| OAB039  | ERR926114              | 55                          | Lactobacillus amylovorus   unannotated                                               | CP002338    | 13596            | 100%     | 1%                |
|         |                        |                             | Lactobacillus allii   phage tail tape measure protein                                | CP019323    | 13596            | 72%      | 4%                |
|         |                        | 79                          | Lactobacillus helveticus   unannotated                                               | CP015444    | 8504             | 100%     | 1%                |
|         |                        |                             | Lactobacillus bacteriophage phi adh                                                  | AJ131519    | 8504             | 67%      | 54%               |
|         |                        | 85                          | Lactobacillus amylovorus   transposase                                               | CP017706    | 7741             | 99%      | 2%                |
|         |                        | 111                         | Lactobacillus johnsonii   polar amino acid ABC transporter permease                  | CP021704    | 5691             | 100%     | 2%                |
|         |                        | 118                         | Lactobacillus crispatus   peptide methionine sulfoxide reductase                     | FN692037    | 5195             | 99%      | 35%               |
|         |                        | 121                         | NO SIGNIFICANT SIMILARITY (e-value<1)                                                | n/a         | 4703             | n/a      | n/a               |
|         |                        | 151                         | Lactobacillus amylovorus   transposase                                               | CP017706    | 3186             | 98%      | 2%                |
|         |                        | 197                         | Actinotignum schaalii   hypothetical protein                                         | CP008802    | 1795             | 92%      | 16%               |
|         |                        | 214                         | Lactobacillus amylovorus   unannotated                                               | CP002338    | 1540             | 98%      | 5%                |
|         |                        | 220                         | Lactobacillus crispatus   tRNA-Ser                                                   | FN692037    | 1423             | 100%     | 30%               |
|         |                        | 230                         | Streptococcus anginosus   hypothetical protein; predicted membrane protein           | AP013072    | 1329             | 94%      | 88%               |
|         |                        | 263                         | Lactobacillus crispatus   conserved protein; Nicotinamide mononucleotide transporter | FN692037    | 1082             | 99%      | 100%              |
|         |                        | 264                         | NO SIGNIFICANT SIMILARITY (e-value<1)                                                | n/a         | 1075             | n/a      | n/a               |
| OAB041  | ERR926115              | NO VIRAL CONTIGS IDENTIFIED |                                                                                      |             |                  |          |                   |

**Supplementary Table 2: Results for contigs predicted to be viral queried via BLAST against the nr/nt database via the NCBI web interface.**

| Patient | SRA Run Accession # | Contig # | BLAST hit (Record Description   Coding Region Annotation)                                                                               | Accession # | Contig Length | Identity | Query Coverage |
|---------|---------------------|----------|-----------------------------------------------------------------------------------------------------------------------------------------|-------------|---------------|----------|----------------|
| OAB042  | ERR926116           | 12       | Homo sapiens FOSMID clone ABC13-1016922M5 from chromosome 9   unresolved tandem repeat                                                  | AC244148    | 6649          | 92%      | 100%           |
|         |                     | 26       | JC virus variant GS/K   complete genome                                                                                                 | AF004349    | 5220          | 98%      | 100%           |
|         |                     | 116      | Homo sapiens chromosome 16 clone CTD-2506I5   unannotated                                                                               | AC137488    | 2788          | 94%      | 100%           |
|         |                     | 118      | Homo sapiens chromosome 21 satellite I sequence   satellite                                                                             | JX174276    | 2767          | 84%      | 100%           |
|         |                     | 256      | Gardnerella vaginalis   hypothetical protein                                                                                            | LT629773    | 1827          | 77%      | 63%            |
|         |                     | 323      | Gardnerella vaginalis   inosine-5'-monophosphate dehydrogenase                                                                          | CP002725    | 1544          | 92%      | 99%            |
|         |                     | 371      | NO SIGNIFICANT SIMILARITY (e-value<1)                                                                                                   | n/a         | 1405          | n/a      | n/a            |
|         |                     | 398      | Gardnerella vaginalis   repeat protein                                                                                                  | CP002725    | 1335          | 81%      | 99%            |
|         |                     | 501      | Homo sapiens BAC clone RP11-18C16 from 4   CpG island                                                                                   | AC110072    | 1096          | 81%      | 98%            |
|         |                     | 504      | Gardnerella vaginalis   hypothetical protein                                                                                            | CP002725    | 1088          | 84%      | 57%            |
|         |                     | 519      | Gardnerella vaginalis   chromosomal replication initiator protein                                                                       | CP002725    | 1050          | 85%      | 92%            |
| OAB045  | ERR926117           | 87       | JC polyomavirus strain #20   complete genome                                                                                            | MF662204    | 5220          | 99%      | 100%           |
|         |                     | 144      | Homo sapiens BAC clone RP11-1162J9 from chromosome unknown   unresolved tandem repeat                                                   | AC144610    | 4072          | 99%      | 100%           |
|         |                     | 203      | Homo sapiens FOSMID clone ABC13-1016922M5 from chromosome 9   unresolved tandem repeat                                                  | AC244148    | 3515          | 99%      | 100%           |
|         |                     | 327      | Enterobacter aerogenes   viral enhancin protein; hypothetical protein; 2,3,4,5-tetrahydropyridine-2,6-carboxylate N-succinyltransferase | CP002824    | 2664          | 99%      | 100%           |
|         |                     | 371      | Klebsiella aerogenes   hypothetical protein; lysozyme                                                                                   | CP011539    | 2489          | 93%      | 78%            |
|         |                     | 456      | Klebsiella aerogenes   phage tail protein; phage tail protein                                                                           | CP014747    | 2208          | 90%      | 82%            |
|         |                     | 464      | Gardnerella vaginalis   hypothetical protein; hypothetical protein                                                                      | CP002725    | 2188          | 97%      | 100%           |
|         |                     | 496      | Enterobacter aerogenes   putative transporter                                                                                           | CP002824    | 2079          | 99%      | 43%            |
|         |                     | 548      | Klebsiella aerogenes   hypothetical protein; host specificity protein J                                                                 | CP011539    | 1963          | 95%      | 99%            |
|         |                     | 550      | Klebsiella aerogenes   bifunctional methylenetetrahydrofolate dehydrogenase; hypothetical protein                                       | CP023963    | 1961          | 99%      | 100%           |
|         |                     | 555      | Gardnerella vaginalis   peptide/nickel transport system substrate-binding protein; pyridoxal 5'-phosphate synthase pdxS subunit         | LT629773    | 1945          | 99%      | 100%           |

**Supplementary Table 2: Results for contigs predicted to be viral queried via BLAST against the nr/nt database via the NCBI web interface.**

| Patient | SRA Run Accession # | Contig # | BLAST hit (Record Description   Coding Region Annotation)                                                                    | Accession # | Contig Length | Identity | Query Coverage |
|---------|---------------------|----------|------------------------------------------------------------------------------------------------------------------------------|-------------|---------------|----------|----------------|
| OAB045  | ERR926117           | 564      | Homo sapiens BAC clone RP13-489M19 from 4   unresolved tandem repeat                                                         | AC127385    | 1921          | 99%      | 100%           |
|         |                     | 707      | Klebsiella aerogenes   hypothetical protein; P22 coat protein                                                                | CP024883    | 1726          | 99%      | 100%           |
|         |                     | 789      | Homo sapiens BAC clone RP11-886I11 from Y   L1 repeat                                                                        | AC134882    | 1607          | 88%      | 100%           |
|         |                     | 798      | Klebsiella aerogenes   phage tail tape measure protein                                                                       | CP014747    | 1597          | 97%      | 100%           |
|         |                     | 867      | Gardnerella vaginalis   alkyl hydroperoxide reductase subunit F; peroxiredoxin (alkyl hydroperoxide reductase subunit C)     | LT629773    | 1518          | 96%      | 100%           |
|         |                     | 892      | Klebsiella aerogenes   long-chain fatty acid--CoA ligase; DNA methyltransferase                                              | CP014748    | 1496          | 96%      | 100%           |
|         |                     | 900      | Gardnerella vaginalis   ribosomal proteins                                                                                   | CP002725    | 1486          | 100%     | 100%           |
|         |                     | 969      | Gardnerella vaginalis   putative lipoprotein                                                                                 | CP002725    | 1410          | 99%      | 100%           |
|         |                     | 970      | Klebsiella aerogenes   glutathione S-transferase; capsular biosynthesis protein                                              | CP024880    | 1410          | 99%      | 100%           |
|         |                     | 991      | Gardnerella vaginalis   hypothetical protein; signal transduction histidine kinase                                           | CP002725    | 1394          | 100%     | 100%           |
|         |                     | 994      | Pan troglodytes BAC clone CH251-398H5 from chromosome 7   unresolved tandem repeat                                           | AC217674    | 1389          | 97%      | 99%            |
|         |                     | 1037     | Klebsiella aerogenes   terminase; hypothetical protein                                                                       | CP014747    | 1358          | 99%      | 100%           |
|         |                     | 1053     | Klebsiella aerogenes   primosomal protein 1; regulatory protein                                                              | CP011539    | 1347          | 98%      | 98%            |
|         |                     | 1080     | Gardnerella vaginalis   phosphoribosyl transferase domain protein; ATPase/histidine kinase/DNA gyrase B/HSP90 domain protein | CP002725    | 1324          | 99%      | 100%           |
|         |                     | 1094     | Gardnerella vaginalis   uncharacterized OsmC-related protein; thymidylate synthase                                           | LT629773    | 1314          | 99%      | 100%           |
|         |                     | 1157     | Klebsiella aerogenes   Hsp33 family molecular chaperone; phosphoenolpyruvate carboxykinase                                   | CP024883    | 1274          | 99%      | 100%           |
|         |                     | 1170     | Raoultella ornithinolytica   capsid protein; serine peptidase                                                                | CP012555    | 1268          | 91%      | 100%           |
|         |                     | 1194     | Bacteriophage phiKO2   putative portal protein; putative head maturation protease                                            | AY374448    | 1252          | 95%      | 100%           |

**Supplementary Table 2: Results for contigs predicted to be viral queried via BLAST against the nr/nt database via the NCBI web interface.**

| Patient | SRA Run Accession # | Contig #                    | BLAST hit (Record Description   Coding Region Annotation)                                                   | Accession # | Contig Length | Identity | Query Coverage |  |
|---------|---------------------|-----------------------------|-------------------------------------------------------------------------------------------------------------|-------------|---------------|----------|----------------|--|
| OAB045  | ERR926117           | 1259                        | Klebsiella aerogenes   GNAT family N-acetyltransferase; hypothetical protein                                | CP024885    | 1207          | 99%      | 76%            |  |
|         |                     | 1321                        | Homo sapiens BAC clone RP11-108I14 from Y   centromeric repeat                                              | AC010970    | 1170          | 87%      | 100%           |  |
|         |                     | 1334                        | Gardnerella vaginalis   DNA binding domain-containing protein, excisionase family; hypothetical protein     | LT629773    | 1162          | 99%      | 100%           |  |
|         |                     | 1338                        | Homo sapiens chromosome 21 satellite I sequence   satellite                                                 | JX174276    | 1160          | 84%      | 99%            |  |
|         |                     | 1361                        | Homo sapiens chromosome 21 satellite I sequence   satellite                                                 | JX174276    | 1148          | 99%      | 99%            |  |
|         |                     | 1398                        | Klebsiella aerogenes   terminase                                                                            | CP024883    | 1136          | 99%      | 99%            |  |
|         |                     | 1424                        | Klebsiella aerogenes   phage tail tape measure protein                                                      | CP014747    | 1124          | 98%      | 100%           |  |
|         |                     | 1482                        | Gardnerella vaginalis   ABC-2 type transport system ATP-binding protein                                     | LT629773    | 1098          | 97%      | 100%           |  |
|         |                     | 1510                        | Enterobacter aerogenes   hemagglutinin domain-containing protein; putative entero exodeoxyribonuclease VIII | CP002824    | 1082          | 97%      | 100%           |  |
|         |                     | 1552                        | Klebsiella aerogenes   myelin regulatory factor                                                             | CP011539    | 1057          | 80%      | 54%            |  |
|         |                     | 1580                        | Klebsiella aerogenes   GNAT family N-acetyltransferase; cysteine tRNA ligase                                | CP024885    | 1044          | 99%      | 100%           |  |
|         |                     | 1582                        | Gardnerella vaginalis   alpha-mannosidase                                                                   | LT629773    | 1044          | 93%      | 94%            |  |
|         |                     | 1654                        | Klebsiella pneumoniae   virulence-related outer membrane protein                                            | AP014950    | 1013          | 85%      | 38%            |  |
|         |                     | 1657                        | Klebsiella aerogenes   lysine decarboxylase LdcC; lysine:cadaverine antiporter                              | CP024883    | 1012          | 99%      | 100%           |  |
| OAB048  | ERR926118           | NO VIRAL CONTIGS IDENTIFIED |                                                                                                             |             |               |          |                |  |
| OAB049  | ERR926119           | 44                          | NO SIGNIFICANT SIMILARITY (e-value<1)                                                                       | n/a         | 1427          | n/a      | n/a            |  |
|         |                     | 46                          | NO SIGNIFICANT SIMILARITY (e-value<1)                                                                       | n/a         | 1392          | n/a      | n/a            |  |
|         |                     | 62                          | Lactobacillus salivarius   transposase                                                                      | CP024065    | 1210          | 90%      | 95%            |  |
|         |                     | 91                          | NO SIGNIFICANT SIMILARITY (e-value<1)                                                                       | n/a         | 1040          | n/a      | n/a            |  |

**Supplementary Table 2: Results for contigs predicted to be viral queried via BLAST against the nr/nt database via the NCBI web interface.**

| Patient | SRA Run<br>Accession #                                                                     | Contig # | BLAST hit (Record Description   Coding Region Annotation)                                                                                                                       | Accession # | Contig<br>Length | Identity | Query<br>Coverage |
|---------|--------------------------------------------------------------------------------------------|----------|---------------------------------------------------------------------------------------------------------------------------------------------------------------------------------|-------------|------------------|----------|-------------------|
| OAB051  | ERR926120                                                                                  | 75       | Human DNA sequence from clone CH17-294F12 on chromosome 20   unannotated                                                                                                        | FO681521    | 1031             | 77%      | 99%               |
|         |                                                                                            | 86       | Corynebacterium jeikeium strain FDAARGOS_328   transposase                                                                                                                      | CP022054    | 1007             | 100%     | 100%              |
| OAB052  | ERR926121                                                                                  | 139      | Gardnerella vaginalis   phage terminase; phage portal protein; endopeptidase Clp; major capsid protein; phage DNA packaging protein; hypothetical protein; hypothetical protein | CP002725    | 4898             | 96%      | 99%               |
|         |                                                                                            | 330      | Gardnerella vaginalis   hypothetical protein                                                                                                                                    | CP019058    | 3131             | 99%      | 100%              |
|         |                                                                                            | 361      | Gardnerella vaginalis   phage antirepressor; hypothetical protein                                                                                                               | CP019058    | 2958             | 94%      | 20%               |
|         |                                                                                            | 368      | NO SIGNIFICANT SIMILARITY (e-value<1)                                                                                                                                           | n/a         | 2941             | n/a      | n/a               |
|         |                                                                                            | 435      | uncultured bacterium clone   transposase                                                                                                                                        | KU546379    | 2582             | 92%      | 39%               |
|         |                                                                                            | 737      | uncultured bacterium clone   endonuclease                                                                                                                                       | KU545938    | 1719             | 97%      | 30%               |
|         |                                                                                            | 782      | Prevotella melaninogenica   transposase                                                                                                                                         | CP022040    | 1654             | 77%      | 93%               |
|         |                                                                                            | 802      | Gardnerella vaginalis   hypothetical protein; hypothetical protein; hypothetical protein; putative DNA-directed DNA polymerase                                                  | CP002725    | 1626             | 96%      | 99%               |
|         |                                                                                            | 825      | Lactobacillus gasseri   putative transposase                                                                                                                                    | CP006803    | 1578             | 99%      | 100%              |
|         |                                                                                            | 828      | Homo sapiens chromosome 21 satellite I sequence   satellite                                                                                                                     | JX174276    | 1573             | 84%      | 100%              |
|         |                                                                                            | 892      | Gardnerella vaginalis   hypothetical protein                                                                                                                                    | CP019058    | 1474             | 98%      | 100%              |
|         |                                                                                            | 906      | NO SIGNIFICANT SIMILARITY (e-value<1)                                                                                                                                           | n/a         | 1459             | n/a      | n/a               |
|         |                                                                                            | 948      | Streptococcus pyogenes   conjugal transfer protein; antirestriction protein ArdA; hypothetical protein; replication initiation protein                                          |             | 1397             | 99%      | 100%              |
| 973     | NO SIGNIFICANT SIMILARITY (e-value<1)                                                      | n/a      | 1367                                                                                                                                                                            | n/a         | n/a              |          |                   |
| 999     | NO SIGNIFICANT SIMILARITY (e-value<1)                                                      | n/a      | 1340                                                                                                                                                                            | n/a         | n/a              |          |                   |
| 1070    | Gardnerella vaginalis   hypothetical protein; Ca-activated chloride channel family protein | LT629773 | 1270                                                                                                                                                                            | 78%         | 96%              |          |                   |
| 1072    | Lactobacillus jensenii   unannotated region                                                | CP018809 | 1267                                                                                                                                                                            | 98%         | 12%              |          |                   |
| 1151    | NO SIGNIFICANT SIMILARITY (e-value<1)                                                      | n/a      | 1178                                                                                                                                                                            | n/a         | n/a              |          |                   |
| 1186    | Homo sapiens homeobox protein DUX3 (DUX3) gene   double homeobox protein                   | AF133130 | 1141                                                                                                                                                                            | 90%         | 100%             |          |                   |

**Supplementary Table 2: Results for contigs predicted to be viral queried via BLAST against the nr/nt database via the NCBI web interface.**

| Patient | SRA Run<br>Accession # | Contig #                    | BLAST hit (Record Description   Coding Region Annotation)            | Accession # | Contig<br>Length | Identity | Query<br>Coverage |  |
|---------|------------------------|-----------------------------|----------------------------------------------------------------------|-------------|------------------|----------|-------------------|--|
| OAB052  | ERR926121              | 1230                        | Gardnerella vaginalis   acetate kinase                               | LT629773    | 1095             | 97%      | 100%              |  |
|         |                        | 1233                        | Gardnerella vaginalis   hypothetical protein                         | CP002725    | 1092             | 93%      | 92%               |  |
|         |                        | 1259                        | Gardnerella vaginalis   DNA repair protein RadA                      | CP002725    | 1068             | 84%      | 99%               |  |
|         |                        | 1269                        | Aerococcus christensenii   DNA-binding protein                       | CP014159    | 1060             | 97%      | 100%              |  |
|         |                        | 1281                        | Streptococcus anginosus   hypothetical protein; hypothetical protein | AP013072    | 1050             | 89%      | 100%              |  |
|         |                        |                             |                                                                      |             |                  |          |                   |  |
| OAB056  | ERR926122              | 23                          | NO SIGNIFICANT SIMILARITY (e-value<1)                                | n/a         | 1583             | n/a      | n/a               |  |
|         |                        | 36                          | Human DNA sequence from clone CH507-39O4 on chromosome 21            | FP236315    | 1319             | 99%      | 100%              |  |
|         |                        | 48                          | Homo sapiens BAC clone RP11-108I14 from Y   centromeric repeat       | AC010970    | 1116             | 87%      | 92%               |  |
|         |                        |                             |                                                                      |             |                  |          |                   |  |
| OAB062  | ERR926123              | NO VIRAL CONTIGS IDENTIFIED |                                                                      |             |                  |          |                   |  |

**Supplementary Table 3: Annotations for putative complete/  
near-complete phage genomes listed in Table 1.**

| <b>OAB010 - contig 28</b> |             |               |                                                 |
|---------------------------|-------------|---------------|-------------------------------------------------|
| <b>start</b>              | <b>stop</b> | <b>strand</b> | <b>function</b>                                 |
| 112                       | 2787        | +             | Phage tail length tape-measure protein          |
| 2784                      | 3509        | +             | FIG01115816: hypothetical protein               |
| 3509                      | 6424        | +             | Phage endopeptidase                             |
| 6437                      | 8293        | +             | Phage structural protein                        |
| 8311                      | 8709        | +             | Holin, toxin secretion/phage lysis              |
| 8711                      | 10117       | +             | Phage-associated cell wall hydrolase            |
| 10898                     | 12139       | +             | Recombinase                                     |
| 12102                     | 13388       | +             | Site-specific recombinase                       |
| 13458                     | 14231       | +             | FIG01120285: hypothetical protein               |
| 14245                     | 15750       | +             | FIG01110938: hypothetical protein               |
| 16000                     | 16212       | +             | hypothetical CDS                                |
| 16330                     | 17067       | +             | Class B acid phosphatase precursor (EC 3.1.3.2) |
| 17439                     | 17305       | -             | hypothetical protein                            |
|                           |             |               |                                                 |
| <b>OAB010 - contig 31</b> |             |               |                                                 |
| <b>start</b>              | <b>stop</b> | <b>strand</b> | <b>function</b>                                 |
| 2467                      | 1742        | -             | FIG01115816: hypothetical protein               |
| 5583                      | 2464        | -             | Phage tail length tape-measure protein          |
| 6297                      | 5878        | -             | prophage pi2 protein 40                         |
| 6878                      | 6309        | -             | Prophage pi2 protein 39                         |
| 7207                      | 6881        | -             | prophage pi2 protein 38                         |
| 7584                      | 7216        | -             | prophage pi2 protein 37                         |
| 7915                      | 7577        | -             | FIG01117178: hypothetical protein               |
| 8097                      | 7915        | -             | unknown phage protein                           |
|                           |             |               |                                                 |
| <b>OAB010 - contig 39</b> |             |               |                                                 |
| <b>start</b>              | <b>stop</b> | <b>strand</b> | <b>function</b>                                 |
| 901                       | 482         | -             | prophage pi2 protein 40                         |
| 1482                      | 913         | -             | Prophage pi2 protein 39                         |
| 1811                      | 1485        | -             | prophage pi2 protein 38                         |
| 2188                      | 1820        | -             | prophage pi2 protein 37                         |
| 2519                      | 2181        | -             | FIG01117178: hypothetical protein               |
| 2776                      | 2519        | -             | unknown phage protein                           |
| 3453                      | 2773        | -             | Phage major capsid protein                      |



**Supplementary Table 3: Annotations for putative complete/  
near-complete phage genomes listed in Table 1.**

**OAB018 - contig 28**

| <b>start</b> | <b>stop</b> | <b>strand</b> | <b>function</b>                                            |
|--------------|-------------|---------------|------------------------------------------------------------|
| 4008         | 901         | -             | DNA polymerase III alpha subunit (EC 2.7.7.7)              |
| 4124         | 4342        | +             | FIG00743751: hypothetical protein                          |
| 5960         | 4404        | -             | 2',3'-cyclic-nucleotide 2'-phosphodiesterase (EC 3.1.4.16) |
| 6255         | 6076        | -             | FIG00752837: hypothetical protein                          |
| 6562         | 6443        | -             | hypothetical protein                                       |
| 7613         | 6726        | -             | Lysin                                                      |
| 8058         | 7603        | -             | Phage protein                                              |
| 8299         | 8048        | -             | hypothetical protein                                       |
| 8731         | 8312        | -             | hypothetical protein                                       |
| 8855         | 8694        | -             | hypothetical protein                                       |
| 9541         | 8855        | -             | hypothetical protein                                       |
| 9873         | 9586        | -             | hypothetical protein                                       |
| 10525        | 10079       | -             | hypothetical protein                                       |
| 10993        | 10583       | -             | hypothetical protein                                       |
| 12640        | 11006       | -             | hypothetical protein                                       |
| 12833        | 12600       | -             | hypothetical protein                                       |
| 16288        | 12842       | -             | Phage endopeptidase                                        |
| 17070        | 16288       | -             | Phage-related protein                                      |
| 23815        | 17060       | -             | Phage tail length tape-measure protein                     |
| 24459        | 23815       | -             | Phage protein                                              |
| 24901        | 24467       | -             | FIG00743450: hypothetical protein                          |
| 25604        | 24924       | -             | major capsid protein gpP                                   |
| 26039        | 25605       | -             | minor capsid protein                                       |
| 26428        | 26039       | -             | minor capsid protein                                       |
| 26778        | 26428       | -             | Phage capsid and scaffold                                  |
| 27163        | 26771       | -             | FIG00754064: hypothetical protein                          |
| 28246        | 27179       | -             | minor capsid protein                                       |
| 28876        | 28256       | -             | Phage capsid scaffolding protein                           |
| 29190        | 28972       | -             | hypothetical protein                                       |
| 30325        | 29192       | -             | Phage minor capsid protein                                 |
| 31934        | 30309       | -             | minor capsid protein                                       |
| 33202        | 31946       | -             | Terminase large subunit [Bacteriophage A118]               |
| 33893        | 33219       | -             | FIG00746678: hypothetical protein                          |
| 34607        | 33903       | -             | ParB domain protein nuclease                               |
| 34957        | 34610       | -             | hypothetical protein                                       |
| 35525        | 35082       | -             | hypothetical protein                                       |
| 36124        | 35525       | -             | hypothetical protein                                       |
| 36290        | 36144       | -             | hypothetical protein                                       |
| 36657        | 36319       | -             | FIG00748422: hypothetical protein                          |

**Supplementary Table 3: Annotations for putative complete/  
near-complete phage genomes listed in Table 1.**

| <b>OAB018 - contig 49</b>        |             |               |                                    |
|----------------------------------|-------------|---------------|------------------------------------|
| <b>start</b>                     | <b>stop</b> | <b>strand</b> | <b>function</b>                    |
| 640                              | 254         | -             | FIG00752284: hypothetical protein  |
| 1539                             | 799         | -             | putative phage minor head protein  |
| 2992                             | 1589        | -             | FIG00748140: hypothetical protein  |
| 4459                             | 3008        | -             | Phage terminase, large subunit     |
| 4997                             | 4452        | -             | Phage Terminase Small Subunit      |
| 5096                             | 5275        | +             | hypothetical protein               |
| 5325                             | 5717        | +             | Phage-related protein              |
| 6450                             | 6094        | -             | hypothetical protein               |
| 6623                             | 6438        | -             | FIG00752030: hypothetical protein  |
| 7079                             | 6624        | -             | FIG00742225: hypothetical protein  |
| 7382                             | 7248        | -             | hypothetical protein               |
| 9507                             | 8983        | -             | Phage related protein              |
| 10011                            | 9526        | -             | Phage Holliday junction resolvase  |
| 10421                            | 10008       | -             | hypothetical protein               |
| 10714                            | 10430       | -             | hypothetical protein               |
| 11102                            | 10701       | -             | hypothetical protein               |
| 11547                            | 11311       | -             | hypothetical protein               |
| 11869                            | 11534       | -             | hypothetical protein               |
| 12670                            | 11873       | -             | Helicase loader Dnal               |
| 13488                            | 12682       | -             | putative phage replication protein |
| 14267                            | 13491       | -             | Phage protein                      |
| 14517                            | 14260       | -             | hypothetical protein               |
| 14826                            | 14527       | -             | hypothetical protein               |
| 15053                            | 14880       | -             | hypothetical protein               |
| 15291                            | 15058       | -             | hypothetical protein               |
| 15615                            | 15301       | -             | hypothetical protein               |
| 16515                            | 15631       | -             | Phage antirepressor protein        |
| 16740                            | 16531       | -             | hypothetical protein               |
| 16891                            | 17229       | +             | CI phage repressor protein         |
| 17241                            | 17642       | +             | hypothetical protein               |
| 17645                            | 18010       | +             | Lj928 prophage protein             |
| 18023                            | 18523       | +             | hypothetical protein               |
| 18623                            | 19753       | +             | Integrase                          |
| 21694                            | 21488       | -             | hypothetical protein               |
| 21916                            | 21728       | -             | hypothetical protein               |
| 22221                            | 22099       | -             | hypothetical protein               |
| 23318                            | 22395       | -             | Lysin                              |
| 23763                            | 23308       | -             | Phage protein                      |
| 23957                            | 23760       | -             | hypothetical protein               |
| 24365                            | 23970       | -             | hypothetical protein               |
| <b>OAB018 - contig 49 (cont)</b> |             |               |                                    |

**Supplementary Table 3: Annotations for putative complete/  
near-complete phage genomes listed in Table 1.**

|                            |             |               |                                        |
|----------------------------|-------------|---------------|----------------------------------------|
| 24591                      | 24328       | -             | hypothetical protein                   |
| 25148                      | 24591       | -             | hypothetical protein                   |
| 25506                      | 25231       | -             | hypothetical protein                   |
| 26137                      | 25496       | -             | hypothetical protein                   |
| 26560                      | 26138       | -             | hypothetical protein                   |
|                            |             |               |                                        |
| <b>OAB018 - contig 66</b>  |             |               |                                        |
| <b>start</b>               | <b>stop</b> | <b>strand</b> | <b>function</b>                        |
| 50                         | 439         | +             | hypothetical protein                   |
| 429                        | 758         | +             | FIG00744673: hypothetical protein      |
| 751                        | 1149        | +             | Phage tail assembly                    |
| 1146                       | 1520        | +             | putative tail component                |
| 1520                       | 2296        | +             | Phage major tail protein               |
| 2377                       | 2790        | +             | hypothetical protein                   |
| 2841                       | 2990        | +             | hypothetical protein                   |
| 3024                       | 10043       | +             | Phage tail length tape-measure protein |
| 10033                      | 10794       | +             | FIG00743423: hypothetical protein      |
| 10764                      | 11825       | +             | FIG00744650: hypothetical protein      |
| 11815                      | 12561       | +             | FIG00744650: hypothetical protein      |
| 12576                      | 14186       | +             | FIG00744650: hypothetical protein      |
| 14191                      | 14385       | +             | hypothetical protein                   |
| 14357                      | 14740       | +             | hypothetical protein                   |
| 14794                      | 17181       | +             | hypothetical protein                   |
| 17198                      | 17593       | +             | FIG00748181: hypothetical protein      |
|                            |             |               |                                        |
| <b>OAB018 - contig 148</b> |             |               |                                        |
| <b>start</b>               | <b>stop</b> | <b>strand</b> | <b>function</b>                        |
| 1148                       | 996         | -             | hypothetical protein                   |
| 1557                       | 1210        | -             | hypothetical protein                   |
| 2361                       | 1651        | -             | major tail protein                     |
| 2729                       | 2343        | -             | Phage tail protein                     |
| 3163                       | 2726        | -             | Phage tail assembly                    |
| 3467                       | 3156        | -             | hypothetical protein                   |
| 3819                       | 3478        | -             | hypothetical protein                   |
| 5070                       | 3838        | -             | Phage capsid protein                   |
| 5843                       | 5082        | -             | Prophage Clp protease-like protein     |
| 6999                       | 5824        | -             | Phage portal protein                   |
| 7193                       | 6999        | -             | hypothetical protein                   |
| 7440                       | 7186        | -             | Phage terminase, large subunit         |

**Supplementary Table 3: Annotations for putative complete/  
near-complete phage genomes listed in Table 1.**

| <b>OAB039 - contig 55</b> |             |               |                                        |
|---------------------------|-------------|---------------|----------------------------------------|
| <b>start</b>              | <b>stop</b> | <b>strand</b> | <b>function</b>                        |
| 480                       | 97          | -             | hypothetical protein                   |
| 646                       | 452         | -             | hypothetical protein                   |
| 4058                      | 651         | -             | FIG00744650: hypothetical protein      |
| 4819                      | 4058        | -             | FIG00743423: hypothetical protein      |
| 11828                     | 4809        | -             | Phage tail length tape-measure protein |
| 12011                     | 11862       | -             | hypothetical protein                   |
| 12475                     | 12062       | -             | hypothetical protein                   |
| 13332                     | 12556       | -             | Phage major tail protein               |
| 13550                     | 13332       | -             | putative tail component                |
|                           |             |               |                                        |
| <b>OAB039 - contig 79</b> |             |               |                                        |
| <b>start</b>              | <b>stop</b> | <b>strand</b> | <b>function</b>                        |
| 270                       | 43          | -             | putative tail component                |
| 665                       | 267         | -             | Phage tail assembly                    |
| 987                       | 658         | -             | FIG00744673: hypothetical protein      |
| 1366                      | 977         | -             | hypothetical protein                   |
| 2741                      | 1383        | -             | Phage capsid protein                   |
| 3383                      | 2760        | -             | Prophage Clp protease-like protein     |
| 4587                      | 3409        | -             | Phage portal protein                   |
| 4802                      | 4590        | -             | hypothetical protein                   |
| 6687                      | 4795        | -             | Phage terminase, large subunit         |
| 6872                      | 6708        | -             | hypothetical protein                   |
| 7071                      | 6931        | -             | hypothetical protein                   |
| 7490                      | 7068        | -             | Phage terminase small subunit          |
| 8129                      | 7650        | -             | Phage-associated homing endonuclease   |
| 8281                      | 8168        | -             | hypothetical protein                   |

# Supplementary Figure 1: Workflow for bioinformatic analysis.

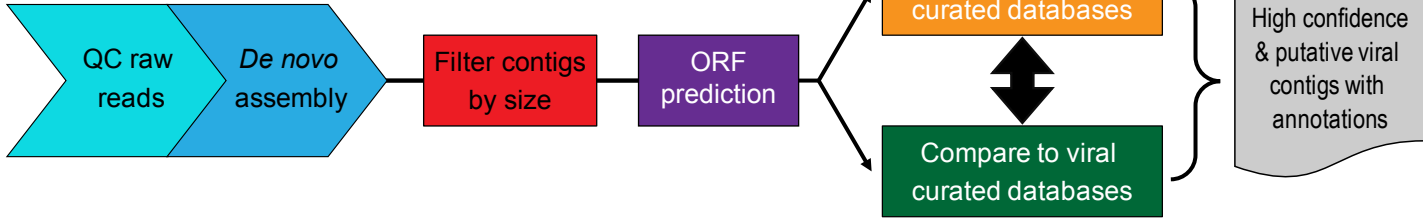

Supplement: jgv-99-1141-s001.pdf [file jgv-99-1141-s001.pdf]
